# Supplementary material
Source: MDPI journal article supplement (https://www.mdpi.com/2073-445X/4/3/627)
Supplement: s1 [file s1]

## Supplementary material

Flooding extent index (FEI) calculated based on MODIS EVI data from 2000 to 2009 in Chobe River Basin

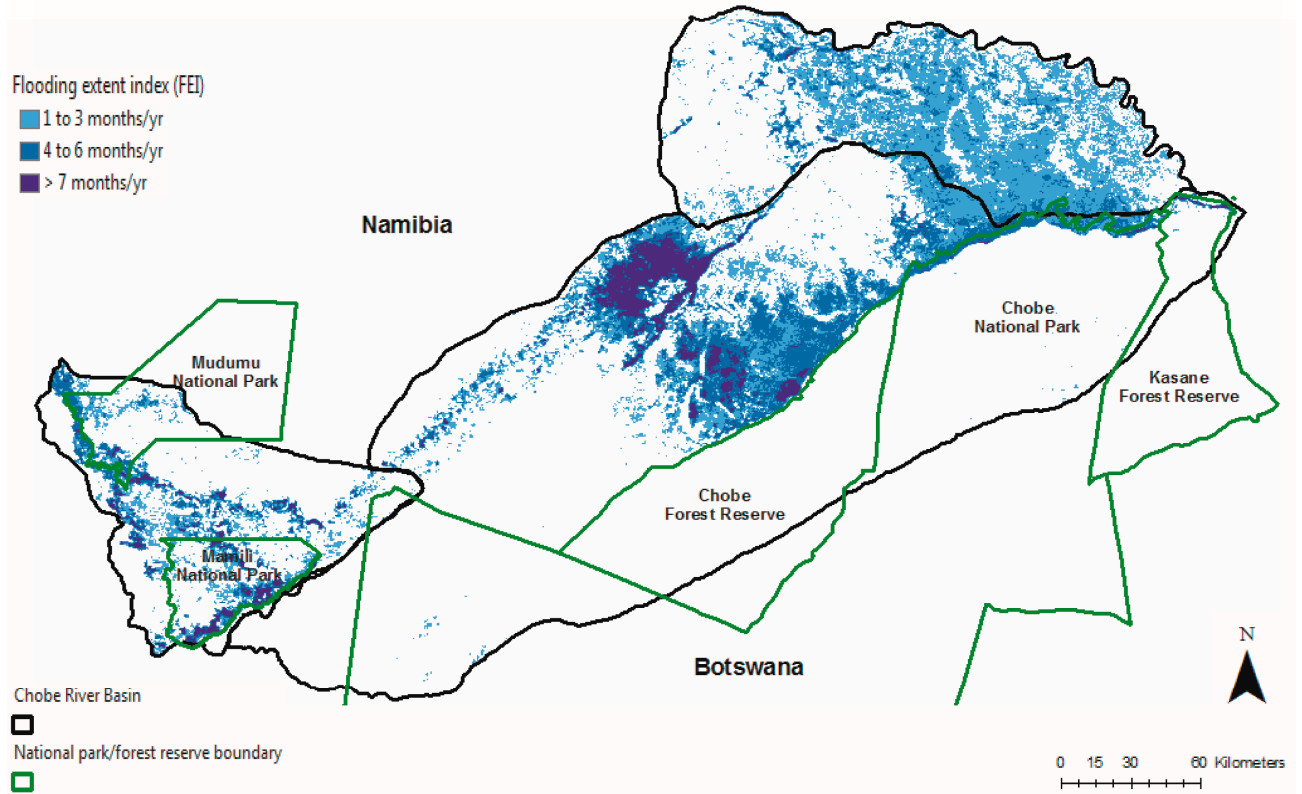

S1. Flooding Extent Index (FEI) in CRB calculated using the 2000-2010 MODIS MOD13Q1A EVI data (supplementary material)

Fire recurrence index (FRI) calculated based on the MODIS Burned Area Product from 2000 to 2010 for Chobe River Basin

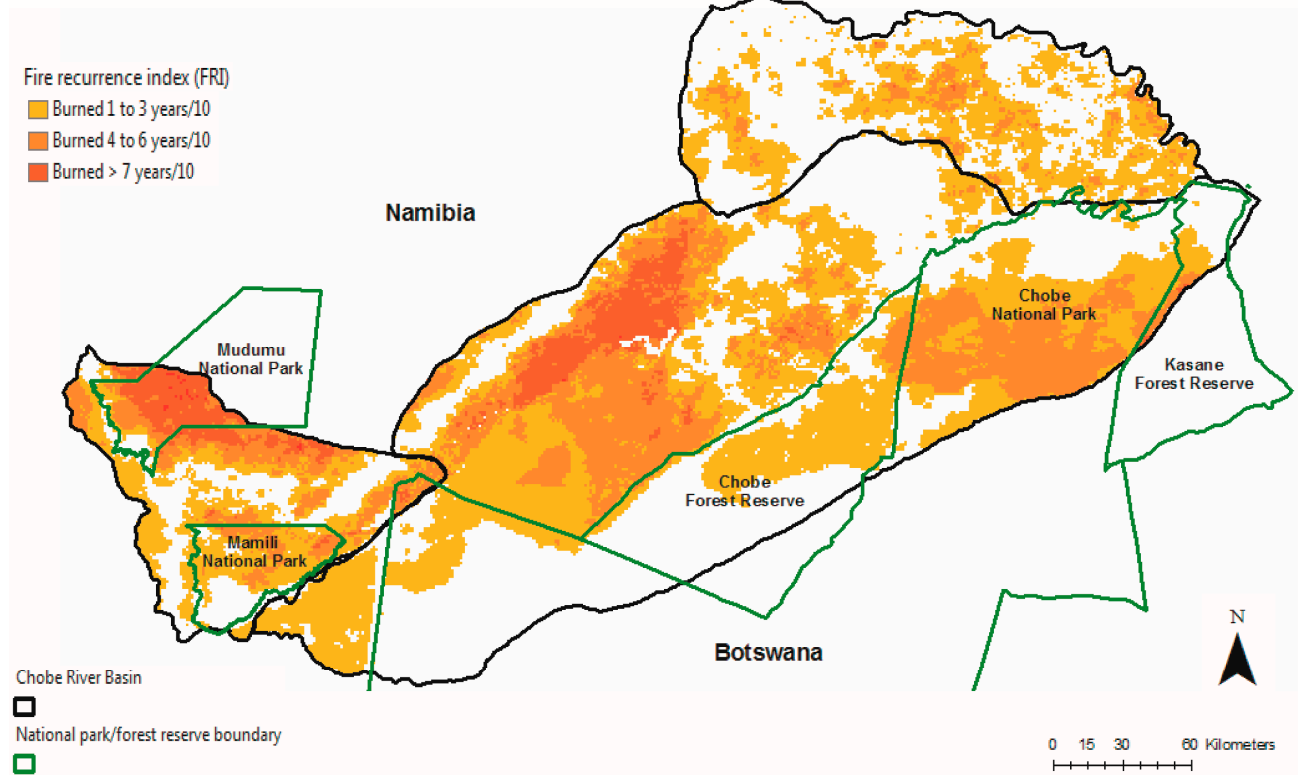

S2. Fire Recurrence Index (FRI) in CRB calculated using 2000-2010 the MODIS MCD45A1 Burned Area Product data (supplementary material).
